# Supplementary material for: Novel microfibrous composite bed reactor: high efficiency H2production from NH3 with potential for portable fuel cell power supplies
Source: Royal Society of Chemistry journal article supplement (doi:10.1039/b608555e), 2006-09-21
Supplement: b608555e.pdf [file b608555e.pdf]

Electronic Supplementary Information

For

**Novel microfibrinous composite bed reactor: high efficiency H<sub>2</sub> production from NH<sub>3</sub> with potential for portable fuel cell power supplies**

**Yong Lu,\* Hong Wang, Ye Liu, Qingsong Xue, Li Chen and Mingyuan He**

*Shanghai Key Laboratory of Green Chemistry and Chemical Processes, Department of Chemistry, East China Normal University, Shanghai 200062, China.*

Tel./Fax: (86) 21 6223-3424; E-mail: ylu@chem.ecnu.edu.cn

**Table S1**

Effect of REO loading on the performance of microfibrous entrapped Ni/REO-Al<sub>2</sub>O<sub>3</sub> catalyst composite for NH<sub>3</sub> decomposition with a 72sccm feed rate at various reaction temperatures in a 0.5cm<sup>3</sup> bed <sup>a</sup>

| REO loading <sup>b</sup><br>(wt%)    | Ni particle<br>size <sup>c</sup> ( <i>d</i> , nm) | Ni dispersion <sup>d</sup><br>( <i>D</i> , %) | NH <sub>3</sub> conversion at various<br>reaction temperature (mol%) |        |        |
|--------------------------------------|---------------------------------------------------|-----------------------------------------------|----------------------------------------------------------------------|--------|--------|
|                                      |                                                   |                                               | 500°C                                                                | 550 °C | 600 °C |
| 0                                    | 21                                                | 4.8                                           | --                                                                   | --     | 90.0   |
| 5 (CeO <sub>2</sub> )                | 22                                                | 4.5                                           | 52.2                                                                 | 87.9   | 99.2   |
| 10 (CeO <sub>2</sub> )               | 25                                                | 4.0                                           | 56.8                                                                 | 90.0   | 99.99  |
| 15 (CeO <sub>2</sub> )               | 25                                                | 4.0                                           | 57.0                                                                 | 89.7   | 99.99  |
| 10 (La <sub>2</sub> O <sub>3</sub> ) | 23                                                | 4.3                                           | 48.3                                                                 | 84.1   | 98.2   |

<sup>a</sup> The Ni loading of 10wt% was constant; the catalytic reaction beds were all reduced at 500°C for 2h in a H<sub>2</sub> flow of 50 sccm prior to NH<sub>3</sub> decomposition. <sup>b</sup> Samples in each step were calcined in air for 2h at 450°C for loading CeO<sub>2</sub> additives but at 250°C for loading Ni. <sup>c</sup> The estimate of Ni particle size (*d*) was approximated by the Scherrer formula on the basis of Ni(111) diffraction line. <sup>d</sup> The nickel dispersion (*D*) was estimated by assuming *d* (nm) = 1/*D*.

**Table S2**

Effect of Ni loading on the performance of microfibrous entrapped Ni/CeO<sub>2</sub>-Al<sub>2</sub>O<sub>3</sub> catalyst composite for NH<sub>3</sub> decomposition with a 72sccm feed rate at various reaction temperatures in a 0.5cm<sup>3</sup> bed <sup>a</sup>

| Ni loading <sup>b</sup><br>(wt%) | Ni particle<br>size <sup>c</sup> ( <i>d</i> , nm) | Ni dispersion <sup>d</sup><br>( <i>D</i> , %) | NH <sub>3</sub> conversion at various reaction<br>temperature (mol%) |        |        |        |
|----------------------------------|---------------------------------------------------|-----------------------------------------------|----------------------------------------------------------------------|--------|--------|--------|
|                                  |                                                   |                                               | 500°C                                                                | 550 °C | 600 °C | 650 °C |
| 5                                | 15                                                | 6.7                                           | 36.0                                                                 | 71.0   | 95.5   | 99.3   |
| 10                               | 25                                                | 4.0                                           | 56.8                                                                 | 90.0   | 99.99  | >99.99 |
| 15                               | 37                                                | 2.7                                           | 49.4                                                                 | 84.4   | 98.3   | 99.8   |

<sup>a</sup> The CeO<sub>2</sub> loading of 10wt% was constant; the catalytic reaction beds were all reduced at 500°C for 2h in a H<sub>2</sub> flow of 50sccm prior to NH<sub>3</sub> decomposition. <sup>b</sup> Samples in each step were calcined in air for 2h at 450°C for loading CeO<sub>2</sub> additives but at 250°C for loading Ni. <sup>c</sup> The estimate of Ni particle size (*d*) was approximated by the Scherrer formula on the basis of Ni(111) diffraction line. <sup>d</sup> The nickel dispersion (*D*) was estimated by assuming *d* (nm) = 1/*D*.

**Table S3**

Effect of calcination temperature in the step (1) of loading CeO<sub>2</sub> on the performance of microfibrinous entrapped Ni/CeO<sub>2</sub>-Al<sub>2</sub>O<sub>3</sub> catalyst composite for NH<sub>3</sub> decomposition with a 72sccm feed rate at various reaction temperatures in a 0.5cm<sup>3</sup> bed <sup>a</sup>

| Calcination temp. in step of loading CeO <sub>2</sub> <sup>b</sup> (°C) | NH <sub>3</sub> conv. at various reaction temp. (mol%) |        |        |
|-------------------------------------------------------------------------|--------------------------------------------------------|--------|--------|
|                                                                         | 500°C                                                  | 550 °C | 600 °C |
| 250                                                                     | 54.7                                                   | 87.7   | 99.1   |
| 450                                                                     | 56.8                                                   | 90.0   | 99.99  |
| 550                                                                     | 50.1                                                   | 75.0   | 93.9   |

<sup>a</sup> The constant loading of 10wt% was used for both CeO<sub>2</sub> additive and Ni; the catalytic reaction beds were all reduced at 500°C for 2h in a H<sub>2</sub> flow of 50sccm prior to NH<sub>3</sub> decomposition. <sup>b</sup> In step of loading CeO<sub>2</sub>, impregnated samples were calcined in air at appointed temperatures for 2h; after subsequently loading Ni by IWI with Ni(NO<sub>3</sub>)<sub>2</sub>·6H<sub>2</sub>O, the catalyst samples were calcined in air at a fixed temperature of 250°C for 2h.

**Table S4**

Effect of calcination temperature in the step (2) of loading Ni on the performance of microfibrinous entrapped Ni/CeO<sub>2</sub>-Al<sub>2</sub>O<sub>3</sub> catalyst composite for NH<sub>3</sub> decomposition with a 72sccm feed rate at various reaction temperatures in a 0.5cm<sup>3</sup> bed <sup>a</sup>

| Calcination temp. in step of loading Ni <sup>b</sup> (°C) | NH <sub>3</sub> conv. at various reaction temp. (mol%) |        |        |
|-----------------------------------------------------------|--------------------------------------------------------|--------|--------|
|                                                           | 500°C                                                  | 550 °C | 600 °C |
| 250                                                       | 56.8                                                   | 90.0   | 99.99  |
| 350                                                       | 40.6                                                   | 77.6   | 96.8   |
| 450                                                       | 37.5                                                   | 75.4   | 96.0   |
| 550                                                       | 35.3                                                   | 70.7   | 94.4   |

<sup>a</sup> The constant loading of 10wt% was used for both CeO<sub>2</sub> additive and Ni; the catalytic reaction beds were all reduced at 500°C for 2h in a H<sub>2</sub> flow of 50 sccm prior to NH<sub>3</sub> decomposition. <sup>b</sup> In step of loading CeO<sub>2</sub>, impregnated samples were calcined in air at a fixed temperature of 450°C for 2h; after subsequently loading Ni by IWI with Ni(NO<sub>3</sub>)<sub>2</sub>·6H<sub>2</sub>O, the catalyst samples were calcined in air at appointed temperatures for 2h.

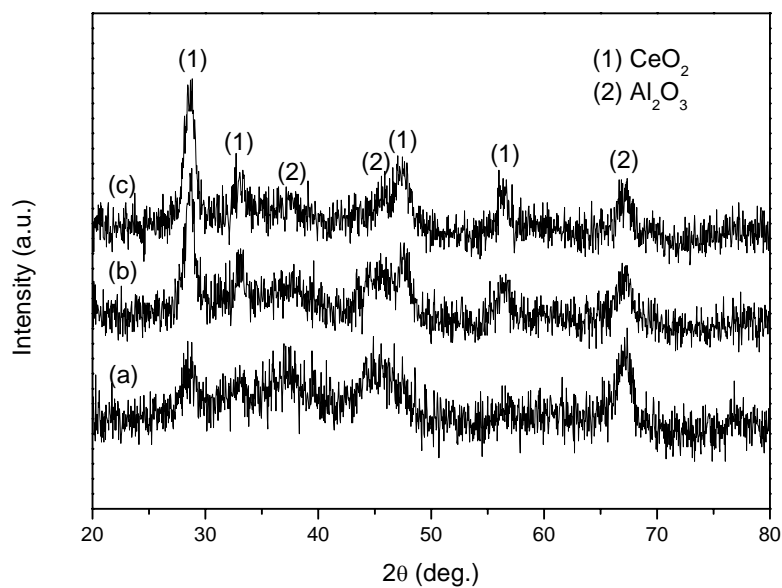

**Fig. S1** XRD patterns of CeO<sub>2</sub>-Al<sub>2</sub>O<sub>3</sub> support samples with CeO<sub>2</sub> loading of (a) 5wt%, (b) 10wt%, and (c) 15wt%. CeO<sub>2</sub>-Al<sub>2</sub>O<sub>3</sub> support particulates were the same samples as in Table S1 that just were loaded with CeO<sub>2</sub> but not with Ni, and were collected by disclosing the microfibrinous network for XRD experiment.

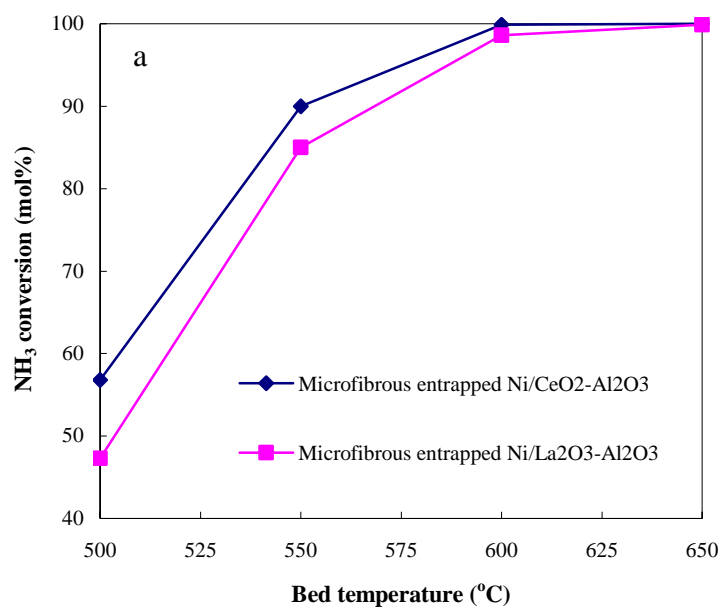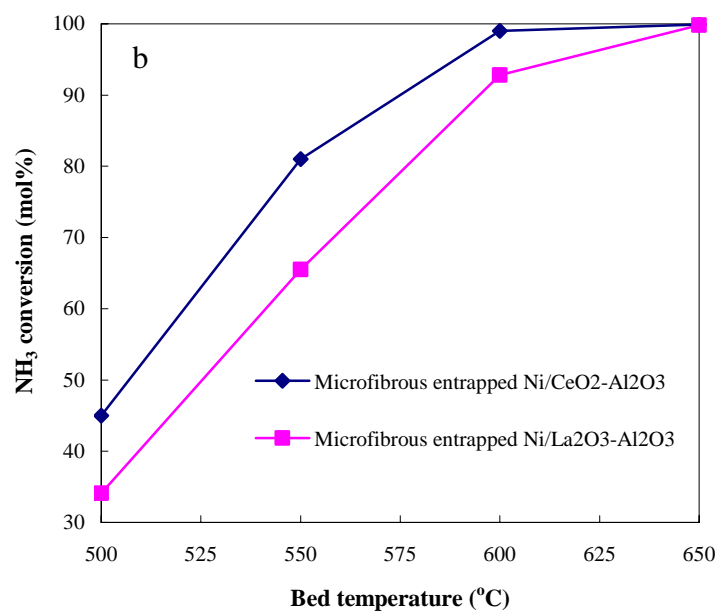

**Fig. S2** NH<sub>3</sub> conversion over CeO<sub>2</sub>- and La<sub>2</sub>O<sub>3</sub>-promoted microfibrous entrapped Ni/Al<sub>2</sub>O<sub>3</sub> catalyst composites at various bed temperatures in bed volume of 0.5ml with NH<sub>3</sub> feed rate of (a) 72sccm and (b) 145sccm, respectively.

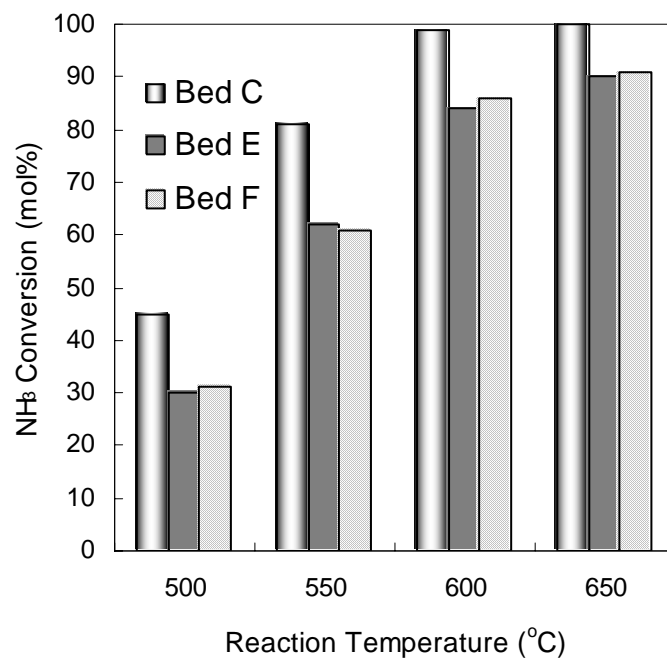

**Fig. S3** Comparison of the reactivity of bed C with beds E and F at various reaction temperatures with a 145sccm NH<sub>3</sub> feed gas rate. See *footnotes* in Table 2 of the paper for the descriptions of beds C, E and F.

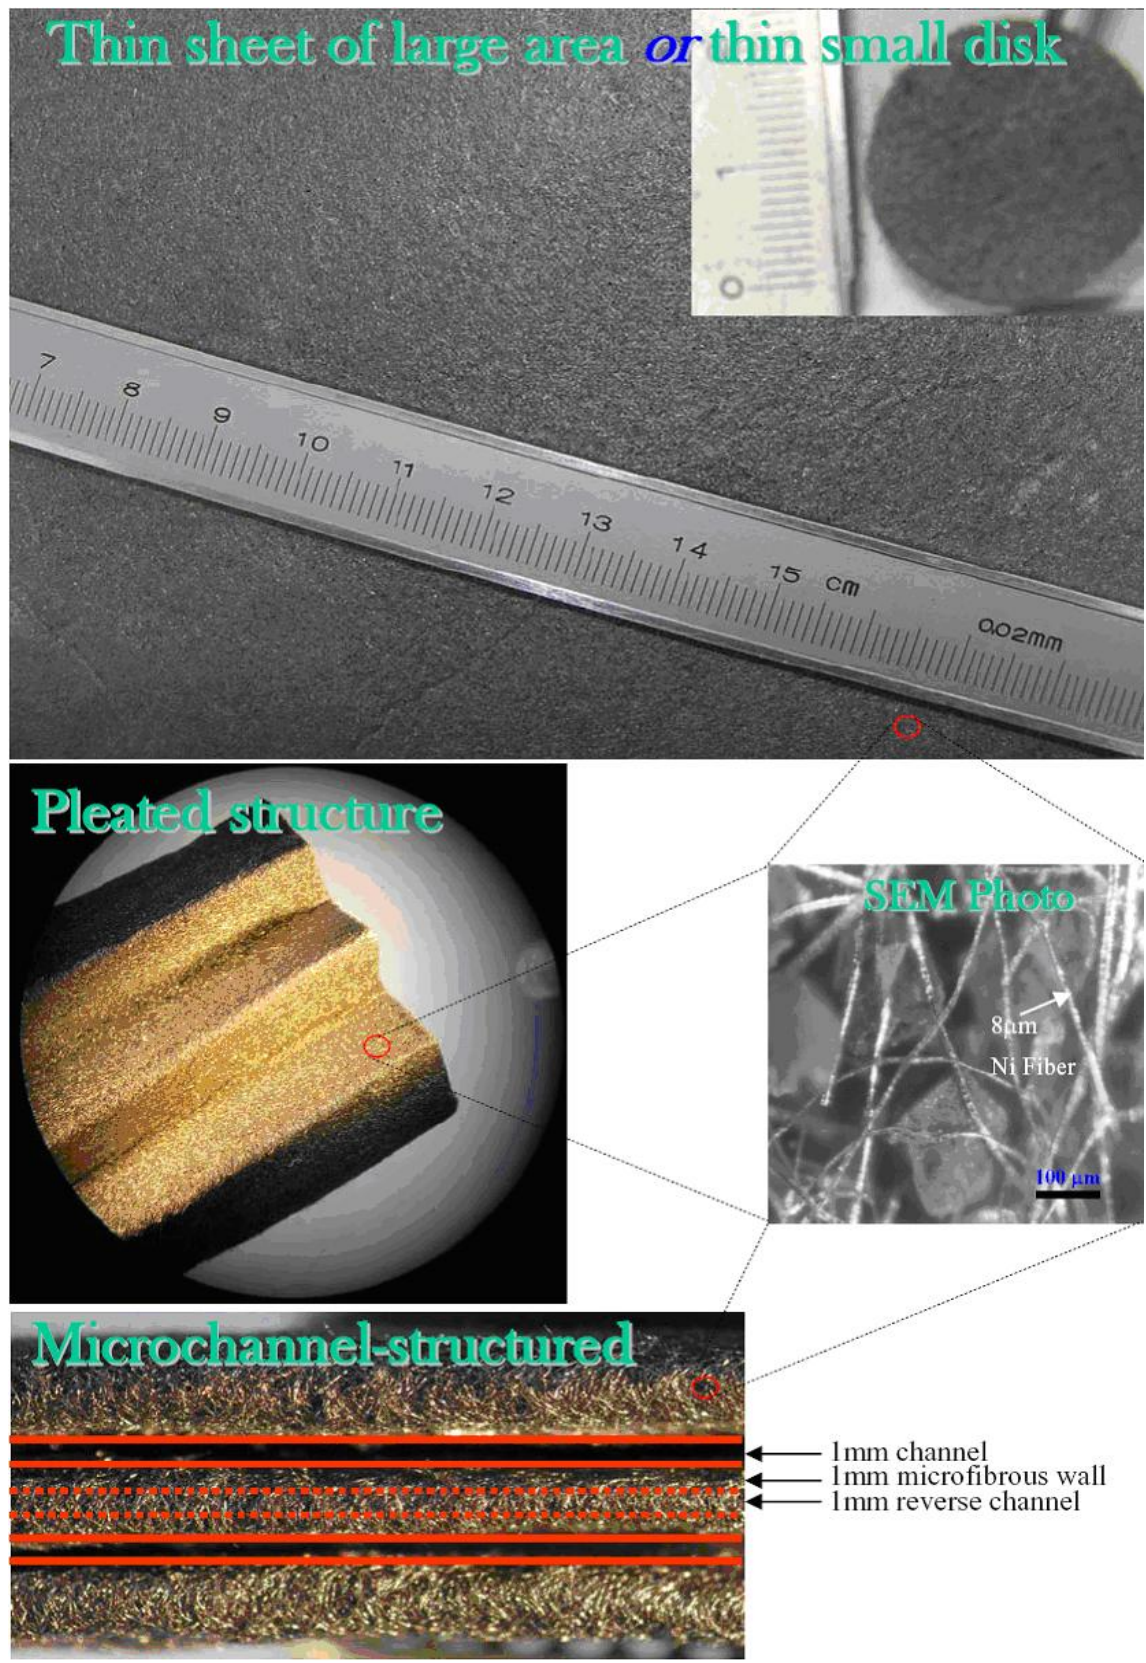

**Fig. S4** Unique form factors of microfibrous media with micron-sized particulates using 8 $\mu$ m diameter nickel microfibers.

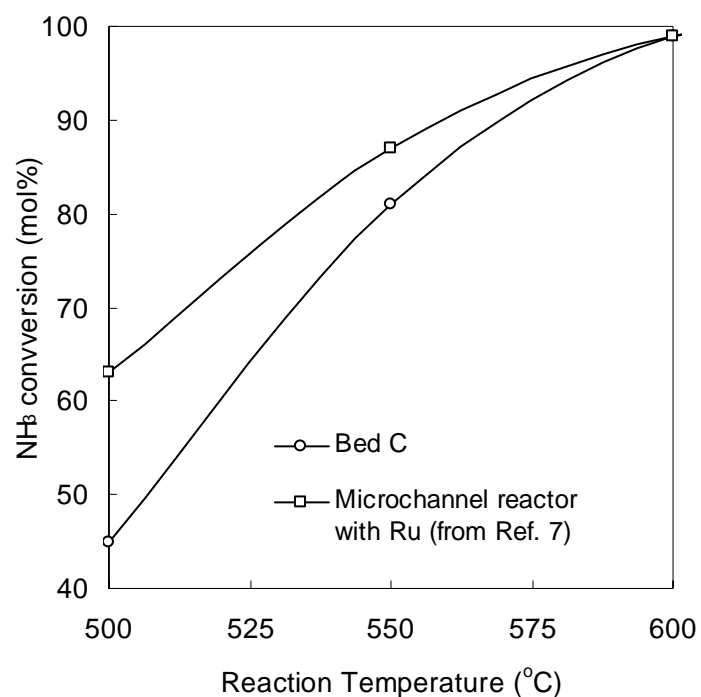

**Fig. S5** Comparison of the performance of bed C with the state-of-the-art microchannel reactor with Ru for  $\text{NH}_3$  decomposition at various reaction temperatures with a 145 sccm  $\text{NH}_3$  feed gas rate. See *footnotes* in Table 2 of the paper for the descriptions of bed C.

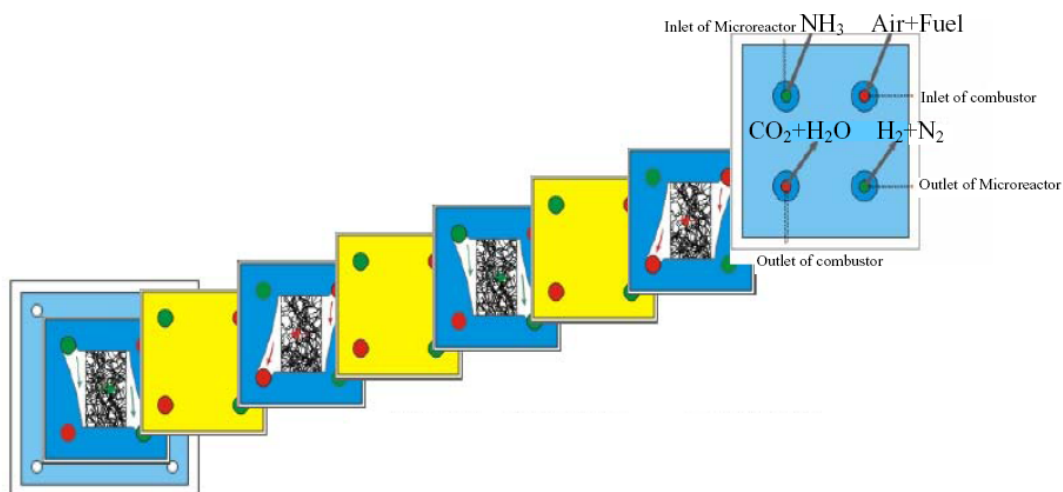

**Fig. S6** Proposed model for a small plate-type reactor system with integrated microcombustor design based on our microfibrinous catalyst composite for  $\text{NH}_3$  decomposition to produce *CO-free*  $\text{H}_2$ .
